# Supplementary material
Source: HighWire-hosted journal article supplement (https://rmdopen.bmj.com/content/8/2/e002571)
Supplement: inline-supplementary-material-1 [file inline-supplementary-material-1.pdf]

## SUPPLEMENTARY FILE 1

### SUPPLEMENTARY METHODS

#### Statistical analyses

Below is the full categorical listing of hypotheses tested. Notably, each of these represents multiple comparisons to be made via contrast between groups and/or treatment arms, and potentially by case status, treatment arm, or visit (baseline or month 12). Categorically, each continuous biomarker was tested for the following:

- *Hypothesis A*: Whether the biomarker is prospectively associated with incident venous thromboembolism (VTE) events at baseline (or on subsequent events at month 12) in at least one arm, but particularly within the tofacitinib 10 mg BID arm, which would be necessary for the biomarker to be useful to identify patients at risk. This was assessed via survival analysis (Cox proportional hazards regression).
- *Hypothesis B*: Whether the biomarker is prospectively associated with incident VTE events differently between treatment arms (at baseline or at month 12 on subsequent events), particularly with the magnitude of association elevated in the tofacitinib 10 mg BID arm compared with the tumour necrosis factor inhibitor (TNFi) arm. This was assessed by testing for an interaction between treatment arm and the baseline biomarker value on incident VTE via survival analysis (via the Cox proportional hazards regression model used for Hypothesis A).
- *Hypothesis C*: Whether the biomarker happens to differ at baseline between treatment arms, particularly if it happens to differ in the direction of an association with incident VTE events (from Hypotheses A and B) more strongly in the tofacitinib 10 mg BID arm than in the TNFi arm. This involved testing for a treatment difference in baseline

values of the biomarker (via simple linear regression), and then comparing with the results from Hypotheses A and B.

- *Hypothesis D*: Whether there is a treatment effect on changes in the biomarker from baseline. This was assessed by testing for a treatment effect on the change from baseline at month 12 of the biomarker by simple linear regression, both in all patients and separately in cases and controls. (A treatment-specific risk biomarker may give a false signal in cases by ascertainment, but treatment-related changes in controls will unambiguously reflect a treatment effect.) In the D-dimer dataset, as data were available from the end-of-study visit, this time point was assessed by a separate longitudinal mixed model in controls only.
- *Hypothesis E*: Whether the change from baseline at month 12 of the biomarker is prospectively associated with incident VTE events in at least one arm, but particularly within the tofacitinib 10 mg BID arm and, in particular, if matching the direction of treatment-related changes from Hypothesis D. This was assessed via survival analysis (Cox proportional hazards regression).
- *Hypothesis F*: Whether the change from baseline at month 12 of the biomarker is prospectively associated with incident VTE events differently between arms, but particularly within the tofacitinib 10 mg BID arm and, in particular, if matching the direction of treatment-related changes from Hypothesis D. This was assessed via the interaction term between treatment arm and the biomarker change from baseline at month 12 in the survival analysis (Cox proportional hazards regression using model from Hypothesis E).
- *Hypothesis G* (not applicable in the D-dimer dataset): A check that the biomarker levels are different between tofacitinib 10 mg BID cases and strongly matched 2:1 TNFi controls (the secondary cohort), validating that any differences observed in

Hypotheses A through F were not due to ascertainment bias from unmatched risk factors.

As a result of the large number of biomarkers assessed and the many relevant contrasts within each hypothesis, biomarkers were filtered for significance (and hence further examination) based on global testing (across the entire cohort) of full statistical models. Generally, these were assessed by analysis of variance (ANOVA) using model comparison. This approach allowed a single P value to assess simultaneously either a uniform prospective association of the biomarker with incident VTE events, or an interaction between treatment arm and the biomarker association with VTE incident events, or any combination of the 2 (see online supplemental table 3, Hypothesis A.0). Similarly, when biomarker levels or changes of biomarker levels are the endpoint, this permitted simultaneous evaluation of a treatment effect or a treatment-by-case-status interaction. This approach allowed for a substantial reduction in the number of tests used to identify biomarkers for follow-up and allowed for a multiple-testing procedure that considered only the number of biomarkers for each test.

Five global tests were used to filter biomarkers for further examination; these are marked as 'primary test' in online supplemental table 3 and are listed together with 'subtests' (which include all contrasts evaluated within the corresponding primary test). Hypotheses and contrasts not included in online supplemental table 3 are subsets of those shown (eg, Hypothesis B.0 is a sub-hypothesis of Hypothesis A.0) or can be partially inferred by the displayed contrasts.

Biomarkers identified as significant by any of the five primary tests described above were evaluated further for potential use as a biomarker to identify patients at risk of VTE events if prescribed tofacitinib, or for potential utility in explaining increased VTE risk in the

tofacitinib treatment arms relative to TNFi. This evaluation was conducted by employing all the tests and subtests enumerated in online supplemental table 3. The criteria for being of potential use for either of the above purposes included meeting any one of the following:

1. If the biomarker was prospectively associated (false discovery rate [FDR] $\leq$ 0.05 in both the contrast and the corresponding primary test) with incident risk of VTE or pulmonary embolism (PE) events within the tofacitinib 10 mg BID arm, either at baseline or at month 12 on subsequent events (subtests of Hypothesis A within tofacitinib 10 mg BID; online supplemental table 3).
2. If the change from baseline at month 12 of the biomarker was prospectively associated (FDR $\leq$ 0.05 in both the contrast and the corresponding primary test) with incident risk of VTE or PE events within the tofacitinib 10 mg BID arm at month 12 on subsequent events (subtest of Hypothesis E within tofacitinib 10 mg BID; online supplemental table 3).
3. If there was a significant difference in baseline levels between treatment arms (FDR  $\leq$ 0.05 for Hypothesis C.0; online supplemental table 3) and the direction of a nominally significant ( $P\leq$ 0.05) difference between the tofacitinib 10 mg BID and TNFi arms in matched controls matches the direction of a filtered nominally significant association (primary test FDR $\leq$ 0.05, contrast  $P\leq$ 0.05) with incident VTE or PE events in the tofacitinib 10 mg BID arm. This association with events was assessed as described in point 1 or point 2 above; that is, either prospectively at baseline, prospectively at month 12, or prospectively for change from baseline at month 12.

4. If there was a significant difference in change from baseline at month 12 levels between treatment arms ( $FDR \leq 0.05$  for Hypothesis D.0; online supplemental table 3), and the direction of a nominally significant ( $P \leq 0.05$ ) difference between the tofacitinib 10 mg BID and TNFi arms in matched controls matches the direction of a filtered nominally significant association (primary test  $FDR \leq 0.05$ , contrast  $P \leq 0.05$ ) with incident PE or VTE in the tofacitinib 10 mg BID arm. Association with incident events was assessed as described in point 3 above.

Any biomarker passing  $FDR \leq 0.05$  for a primary test and satisfying any of the four criteria above is discussed in this manuscript. Furthermore, any biomarker meeting the aforementioned criteria was also examined for significant effects between the tofacitinib 5 mg BID arm and TNFi treatment arms, using the same tests that were applied to the tofacitinib 10 mg BID treatment arm.

## **SUPPLEMENTARY RESULTS**

### **Risk factor analyses**

Analyses were performed to explore the potential incremental value of D-dimer monitoring in patients treated with tofacitinib with known VTE risk factors. Of the patients enrolled in ORAL Surveillance who were eligible for D-dimer analysis, the majority had at least one VTE risk factor (namely, previous VTE, major surgery, immobilization, myocardial infarction within the previous 3 months, heart failure, use of combined hormonal contraceptives or hormone replacement therapy, thrombophilia [including factor V Leiden mutation, and antithrombin, protein C, and protein S deficiency], malignancy, advanced age, obesity [body mass index (BMI)  $\geq 30$  kg/m<sup>2</sup>], diabetes, hypertension, or smoking). This is primarily attributable to a study population that was, by design, older (age  $\geq 50$  years) with at

least one additional cardiovascular risk factor. All VTE events occurred in patients with at least one VTE risk factor.

The number of cases in patients with and without the risk factors of age  $\geq 65$  years, BMI  $\geq 30$  kg/m<sup>2</sup>, history of smoking, and history of hypertension was assessed by D-dimer levels  $< 2 \times \text{ULN}$  and  $\geq 2 \times \text{ULN}$  (other risk factors were investigated but not presented due to low event numbers).

In patients  $\geq 65$  years at baseline, in the tofacitinib 10 mg BID arm, a higher proportion of patients with D-dimer levels  $\geq 2 \times \text{ULN}$  developed VTE events compared with those with lower D-dimer levels and also compared with patients receiving TNFi with high D-dimer levels (online supplemental table 8). A similar trend, but less evident, was observed with tofacitinib 5 mg BID. The difference was even more evident when month 12 levels were assessed. These effects, both at baseline and at month 12, were less evident in patients  $< 65$  years.

Similar general trends were also observed when the dichotomous D-dimer cutoff, either at baseline or at month 12, was used to analyse BMI (online supplemental table 9), smoking history (online supplemental table 10), or hypertension (online supplemental table 11) as risk factors for VTE events. However, these observations should be interpreted with caution because of the low number of VTE cases overall.

**Table S 1** Biomarkers assessed and assays used

| Biomarker evaluated | Test assay name (supplier, catalogue no.)                                    | Mode of action/pathway involved                                                                                                                                                                                    |
|---------------------|------------------------------------------------------------------------------|--------------------------------------------------------------------------------------------------------------------------------------------------------------------------------------------------------------------|
| Tier 1              |                                                                              |                                                                                                                                                                                                                    |
| D-dimer             | Tina-quant D-Dimer (Roche Diagnostics, 3001245322)                           | Formed as a product of fibrin degradation; present in blood after blood clot is degraded by fibrinolysis (19)                                                                                                      |
| CRP                 | Cardiophase hsCRP (Siemens Healthineers, OQIY21)                             | Marker of systemic inflammation, regulated by IL-6, which signals through JAKs (26,30)                                                                                                                             |
| TPO                 | U-PLEX Human TPO ECL Assay (Meso Scale Diagnostics, K151VKK)                 | Growth factor that is central to the regulation of platelet levels (31); platelets are produced by megakaryocytes that require TPO signalling via JAK2-dependent MPL receptors for development and maturation (27) |
| Tier 2              |                                                                              |                                                                                                                                                                                                                    |
| Factor VIII         | VisuLize FVIII ELISA (Affinity Biologicals, FVIII-AG)                        | Blood clotting protein in the coagulation cascade (32)                                                                                                                                                             |
| TAT                 | Enzygnost TAT Micro ELISA (Siemens Healthcare Diagnostic Products, 10446632) | Formed when thrombin concentrations are elevated (33)                                                                                                                                                              |
| TFPI                | Human TFPI Quantikine ELISA (R&D Systems, DTFP10)                            | Reversibly inhibits FXa (34)                                                                                                                                                                                       |
| PAI-1               | Human PAI-1 Quantikine ELISA (R&D Systems, DSE100)                           | Inhibits fibrinolysis (35)                                                                                                                                                                                         |
| Protein C           | ZYMUTEST Protein C Antigen (HYPHEN BioMed, RK027A)                           | Activated protein C neutralizes FVa and FVIIIa (36,37)                                                                                                                                                             |

| Biomarker evaluated            | Test assay name (supplier, catalogue no.)                                                                                                                                                                                                                                                                                                                                                                                                                                                                                                                                                                                                                                                                                                                                                                                                                                                                                            | Mode of action/pathway involved                                                                                                                             |
|--------------------------------|--------------------------------------------------------------------------------------------------------------------------------------------------------------------------------------------------------------------------------------------------------------------------------------------------------------------------------------------------------------------------------------------------------------------------------------------------------------------------------------------------------------------------------------------------------------------------------------------------------------------------------------------------------------------------------------------------------------------------------------------------------------------------------------------------------------------------------------------------------------------------------------------------------------------------------------|-------------------------------------------------------------------------------------------------------------------------------------------------------------|
| AT                             | Human ATIII Quantikine ELISA (R&D Systems, DSPC10)                                                                                                                                                                                                                                                                                                                                                                                                                                                                                                                                                                                                                                                                                                                                                                                                                                                                                   | Inhibits thrombin and FXa (38)                                                                                                                              |
| ApoCIII                        | Human Apolipoprotein CIII ELISA (Abcam, ab154131)                                                                                                                                                                                                                                                                                                                                                                                                                                                                                                                                                                                                                                                                                                                                                                                                                                                                                    | Marker of triglyceride-rich lipoproteins; elevated levels predispose to development of atherosclerotic disease (39)                                         |
| Leptin                         | Human Leptin ECL Assay (Meso Scale Diagnostics, K151BYC)                                                                                                                                                                                                                                                                                                                                                                                                                                                                                                                                                                                                                                                                                                                                                                                                                                                                             | Adipokine; mediates prothrombotic risk in obesity by promoting platelet adhesion/activation/aggregation (40)                                                |
| Tiers 3 and 4                  |                                                                                                                                                                                                                                                                                                                                                                                                                                                                                                                                                                                                                                                                                                                                                                                                                                                                                                                                      |                                                                                                                                                             |
| Proteomic arrays (276 markers) | <p>Olink Cardiometabolic (Olink Proteomics, 95360)</p> <ul style="list-style-type: none"> <li>• <i>Tier 3</i>: CCL14, CCL18, CCL5, F7, F11, GP1BA, ICAM1, ICAM3, OSMR, PLA2G7, VCAM1, PROC, CST3, MBL2, LCN2, and SELL</li> <li>• <i>Tier 4</i>: All other markers not named above</li> </ul> <p>Olink Cardiovascular II (Olink Proteomics, 95500)</p> <ul style="list-style-type: none"> <li>• <i>Tier 3</i>: ADAM-TS13, ANGPT1, CCL17, CCL3, CD40-L, CXCL1, IL-6, LEP, PDGF subunit B, TF, THBS2, TM, THPO, TIE2, TRAIL-R2, VEGF-D, BNP, PTX3, LPL, IL-18, IL-27, and RAGE</li> <li>• <i>Tier 4</i>: All markers not named above</li> </ul> <p>Olink Cardiovascular III (Olink Proteomics, 95611)</p> <ul style="list-style-type: none"> <li>• <i>Tier 3</i>: CCL15, CCL16, CCL24, CXCL16, EGFR, KLK6, PAI, PDGF subunit A, SELE, SELP, TFPI, tPA, uPA, VWF, OPG, Gal-3, MCP-1, MPO, OPN, CD163, PON3, TNFR1, and TNFR2</li> </ul> | Proteins including cytokines and chemokines based on known role in platelet activation, the coagulation cascade, endothelial function, or inflammation (41) |



| Biomarker evaluated                                                                            | Test assay name (supplier, catalogue no.)                         | Mode of action/pathway involved                                                             |
|------------------------------------------------------------------------------------------------|-------------------------------------------------------------------|---------------------------------------------------------------------------------------------|
| <ul style="list-style-type: none"> <li>• <i>Tier 4</i>: All markers not named above</li> </ul> |                                                                   |                                                                                             |
| Genetic biomarkers                                                                             |                                                                   |                                                                                             |
| Factor V Leiden (FVL/F5 R506Q)                                                                 | TaqMan assay (Thermo Fisher Scientific)                           | Mutation associated with increased risk of VTE (11)                                         |
| Prothrombin (F2, G20210A)                                                                      | TaqMan assay (Thermo Fisher Scientific)                           | Mutation associated with increased risk of VTE (12)                                         |
| JAK2 V617F mutations                                                                           | TaqMan assay (Thermo Fisher Scientific)                           | Mutation associated with myeloproliferative disorders (42); known association with VTE (13) |
| Antibody biomarkers                                                                            |                                                                   |                                                                                             |
| ACA IgG                                                                                        | QUANTA Lite ACA IgG III ELISA (Inova Diagnostics, 708625.10)      | Acquired thrombophilia (14)                                                                 |
| ACA IgM                                                                                        | QUANTA Lite ACA IgM III ELISA (Inova Diagnostics, 708630.10)      | Acquired thrombophilia (14)                                                                 |
| Anti- $\beta$ 2GP1 IgG                                                                         | QUANTA Lite $\beta$ 2GP1 IgG ELISA (Inova Diagnostics, 708665.10) | Acquired thrombophilia (14)                                                                 |
| Anti- $\beta$ 2GP1 IgM                                                                         | QUANTA Lite $\beta$ 2GP1 IgM ELISA (Inova Diagnostics, 708670.10) | Acquired thrombophilia (14)                                                                 |

ACA, anticardiolipin antibody; ADAM-TS13, a disintegrin and metalloproteinase with thrombospondin motifs 13; ANGPT1, angiopoietin-1; apoCIII, apolipoprotein C-III;

AT, antithrombin; ATIII, antithrombin-III;  $\beta$ 2GP1, beta-2-glycoprotein 1; BNP, B-type natriuretic peptide; CCL, Cys-Cys motif chemokine ligand; CD40-L, cluster of differentiation 40 ligand; CD163, cluster of differentiation 163; CRP, C-reactive protein; CST3, cystatin-3; CXCL, C-X-C motif chemokine ligand; EGFR, epidermal growth

factor receptor; ELISA, enzyme-linked immunosorbent assay; F2, factor II; F7, factor VII; F11, factor XI; FVa, factor Va; FVIII, factor VIII; FVIIIa, factor VIIIa; FXa, factor Xa; Gal-3, galectin-3; GPIBA, platelet glycoprotein Ib alpha chain; hsCRP, high-sensitivity C-reactive protein; ICAM, intercellular adhesion molecule; IgG, immunoglobulin G; IgM, immunoglobulin M; IL, interleukin; JAK, Janus kinase; KLK6, kallikrein-6; LCN2, neutrophil gelatinase-associated lipocalin; LEP, leptin; LPL, lipoprotein lipase; MBL2, mannose-binding protein C; MCP-1, monocyte chemotactic protein-1; MPL, myeloproliferative leukaemia protein; MPO, myeloperoxidase; OPG, osteoprotegerin; OPN, osteopontin; OSMR, oncostatin-M-specific receptor subunit beta; PAI, plasminogen activator inhibitor 1; PDGF, platelet-derived growth factor; PLA2G7, platelet-activating factor acetylhydrolase; PON3, paraoxonase 3; PROC, vitamin K-dependent protein C; PTX3, pentraxin-related protein 3; RAGE, advanced glycosylation end product-specific receptor; SELE, E-selectin; SELL, L-selectin; SELP, P-selectin; TAT, thrombin-antithrombin complex; TF, tissue factor; TFPI, tissue factor pathway inhibitor; THBS2, thrombospondin-2; THPO/TPO, thrombopoietin; TIE2, angiopoietin-1 receptor; TM, thrombomodulin; TNFR, tumour necrosis factor receptor; tPA, tissue-type plasminogen activator; TRAIL-R2, TNF-related apoptosis-inducing ligand receptor 2; uPA, urokinase-type plasminogen activator; VCAM1, vascular cell adhesion protein 1; VEGF-D, vascular endothelial growth factor D; VTE, venous thromboembolism; VWF, von Willebrand factor.

**Table S 2** Sample availability by event type (early or late), time point, and treatment arm

| Data source                      | Treatment arm          | No VTE/PE<br>(controls),<br>n (%) | Early VTE event<br>(before month<br>12), n (%) | Late VTE event<br>(after month 12),<br>n (%) | Early PE event<br>(before month<br>12), n (%) | Late PE event<br>(after month 12),<br>n (%) |
|----------------------------------|------------------------|-----------------------------------|------------------------------------------------|----------------------------------------------|-----------------------------------------------|---------------------------------------------|
| Exploratory biomarker dataset    |                        |                                   |                                                |                                              |                                               |                                             |
| Total patients                   | Tofacitinib 5 mg BID   | 57 (25)                           | 4 (21)                                         | 10 (26)                                      | 2 (15)                                        | 7 (37)                                      |
|                                  | Tofacitinib 10 mg BID* | 117 (51)                          | 10 (53)                                        | 20 (53)                                      | 8 (62)                                        | 12 (63)                                     |
|                                  | TNFi                   | 54 (24)                           | 5 (26)                                         | 8 (21)                                       | 3 (23)                                        | 0 (0)                                       |
| Baseline sample                  | Tofacitinib 5 mg BID   | 57 (25)                           | 4 (21)                                         | 10 (26)                                      | 2 (15)                                        | 7 (37)                                      |
|                                  | Tofacitinib 10 mg BID* | 117 (51)                          | 10 (53)                                        | 20 (53)                                      | 8 (62)                                        | 12 (63)                                     |
|                                  | TNFi                   | 54 (24)                           | 5 (26)                                         | 8 (21)                                       | 3 (23)                                        | 0 (0)                                       |
| Baseline and<br>month 12 samples | Tofacitinib 5 mg BID   | 57 (25)                           | 3 (23)                                         | 9 (25)                                       | 1 (11)                                        | 6 (35)                                      |
|                                  | Tofacitinib 10 mg BID* | 117 (51)                          | 9 (69)                                         | 19 (53)                                      | 7 (78)                                        | 11 (65)                                     |
|                                  | TNFi                   | 54 (24)                           | 1 (8)                                          | 8 (22)                                       | 1 (11)                                        | 0 (0)                                       |
| D-dimer dataset                  |                        |                                   |                                                |                                              |                                               |                                             |
| Total patients                   | Tofacitinib 5 mg BID   | 1392 (34)                         | 5 (28)                                         | 11 (28)                                      | 2 (17)                                        | 7 (30)                                      |
|                                  | Tofacitinib 10 mg BID* | 1357 (33)                         | 10 (56)                                        | 23 (57)                                      | 8 (67)                                        | 15 (65)                                     |
|                                  | TNFi                   | 1380 (33)                         | 3 (17)                                         | 6 (15)                                       | 2 (17)                                        | 1 (4)                                       |

| Data source                                        | Treatment arm          | No VTE/PE<br>(controls),<br>n (%) | Early VTE event<br>(before month<br>12), n (%) | Late VTE event<br>(after month 12),<br>n (%) | Early PE event<br>(before month<br>12), n (%) | Late PE event<br>(after month 12),<br>n (%) |
|----------------------------------------------------|------------------------|-----------------------------------|------------------------------------------------|----------------------------------------------|-----------------------------------------------|---------------------------------------------|
| Baseline sample                                    | Tofacitinib 5 mg BID   | 1243 (34)                         | 4 (24)                                         | 10 (27)                                      | 2 (17)                                        | 7 (33)                                      |
|                                                    | Tofacitinib 10 mg BID* | 1194 (32)                         | 10 (59)                                        | 21 (57)                                      | 8 (67)                                        | 13 (62)                                     |
|                                                    | TNFi                   | 1241 (34)                         | 3 (18)                                         | 6 (16)                                       | 2 (17)                                        | 1 (5)                                       |
| Baseline and<br>month 12 samples                   | Tofacitinib 5 mg BID   | 1057 (34)                         | –                                              | 6 (21)                                       | –                                             | 5 (29)                                      |
|                                                    | Tofacitinib 10 mg BID* | 985 (32)                          | –                                              | 18 (62)                                      | –                                             | 11 (65)                                     |
|                                                    | TNFi                   | 1042 (34)                         | –                                              | 5 (17)                                       | –                                             | 1 (6)                                       |
| Baseline and end-<br>of-study samples <sup>†</sup> | Tofacitinib 5 mg BID   | 427 (34)                          | –                                              | –                                            | –                                             | –                                           |
|                                                    | Tofacitinib 10 mg BID* | 382 (30)                          | –                                              | –                                            | –                                             | –                                           |
|                                                    | TNFi                   | 444 (35)                          | –                                              | –                                            | –                                             | –                                           |

Percentage values refer to the proportion of patients in each treatment arm for a given category.

\*For patients assigned to receive tofacitinib at a dose of 10 mg BID who had their dose reduced to 5 mg BID, the data collected after patients had been switched to 5 mg BID were counted in the arm receiving 10 mg BID. <sup>†</sup>No end-of-study samples from VTE/PE cases were analysed due to the confounding effect of anti-coagulant therapy.

BID, twice daily; PE, pulmonary embolism; TNFi, tumour necrosis factor inhibitor; VTE, venous thromboembolism.

**Table S 3** Primary statistical tests and hypotheses

| Hypothesis reference | Hypothesis description                                                                     | Sub-hypothesis name <sup>†</sup>             | Role                | Sub-hypothesis description                                               | Additional subsetting | Statistical method                                                                                             |
|----------------------|--------------------------------------------------------------------------------------------|----------------------------------------------|---------------------|--------------------------------------------------------------------------|-----------------------|----------------------------------------------------------------------------------------------------------------|
| A                    | Biomarker X is prospectively associated with incident events in at least one treatment arm | <u>A.0.bl Overall, possible interaction</u>  | <u>Primary test</u> | <u>Any combination of a uniform effect and a differing effect by arm</u> | Baseline              | Cox regression (D-dimer and full clinical datasets)<br>Cox regression with IPW (exploratory biomarker dataset) |
|                      |                                                                                            | A.1.bl Tofacitinib 5 mg                      | Subtest             | Test association (HR per unit X) on incident events in each arm          |                       |                                                                                                                |
|                      |                                                                                            | A.1.bl Tofacitinib 10 mg                     | Subtest             |                                                                          |                       |                                                                                                                |
|                      |                                                                                            | A.1.bl TNFi                                  | Subtest             |                                                                          |                       |                                                                                                                |
|                      |                                                                                            | <u>A.0.12m Overall, possible interaction</u> | <u>Primary test</u> | <u>Any combination of a uniform effect and a differing effect by arm</u> | Month 12              |                                                                                                                |
|                      |                                                                                            | A.1.12m Tofacitinib 5 mg                     | Subtest             | Test association (HR per unit X) on incident events in each arm          |                       |                                                                                                                |
|                      |                                                                                            | A.1.12m Tofacitinib 10 mg                    | Subtest             |                                                                          |                       |                                                                                                                |
|                      |                                                                                            | A.1.12m TNFi                                 | Subtest             |                                                                          |                       |                                                                                                                |
| C                    | Baseline levels of biomarker X differed by treatment arm                                   | <u>C.0 Overall</u>                           | <u>Primary test</u> | <u>Test difference in baseline X across all arms</u>                     | Baseline              | Linear regression                                                                                              |
|                      |                                                                                            | C.2.ctrl Tofacitinib 5 mg vs TNFi            | Subtest             | Test difference in baseline X between 2 arms in controls only            |                       |                                                                                                                |
|                      |                                                                                            | C.2.ctrl Tofacitinib 10 mg vs TNFi           | Subtest             |                                                                          |                       |                                                                                                                |
|                      |                                                                                            | C.3.case Tofacitinib 5 mg vs TNFi            | Subtest             | Test difference in baseline X between 2 arms in cases only               |                       |                                                                                                                |
|                      |                                                                                            | C.3.case Tofacitinib 10 mg vs TNFi           | Subtest             |                                                                          |                       |                                                                                                                |

| Hypothesis reference | Hypothesis description                                                               | Sub-hypothesis name <sup>†</sup>   | Role                | Sub-hypothesis description                                                          | Additional subsetting                                                               | Statistical method                                                                                             |
|----------------------|--------------------------------------------------------------------------------------|------------------------------------|---------------------|-------------------------------------------------------------------------------------|-------------------------------------------------------------------------------------|----------------------------------------------------------------------------------------------------------------|
| D                    | Biomarker X experienced treatment-dependent changes                                  | <u>D.0 Overall</u>                 | <u>Primary test</u> | <u>Test difference in CFB.X across all arms</u>                                     | Only CFB.X at month 12 (for controls in D-dimer dataset, CFB.X at month 12 and EOS) | Linear regression                                                                                              |
|                      |                                                                                      | D.2.ctrl Tofacitinib 5 mg vs TNFi  | Subtest             | Test difference in CFB.X between 2 arms in controls only                            |                                                                                     |                                                                                                                |
|                      |                                                                                      | D.2.ctrl Tofacitinib 10 mg vs TNFi | Subtest             | Test difference in CFB.X between 2 arms in cases only                               |                                                                                     |                                                                                                                |
|                      |                                                                                      | D.3.case Tofacitinib 5 mg vs TNFi  | Subtest             |                                                                                     |                                                                                     |                                                                                                                |
|                      |                                                                                      | D.3.case Tofacitinib 10 mg vs TNFi | Subtest             |                                                                                     |                                                                                     |                                                                                                                |
| E                    | CFB.X is prospectively associated with incident events in at least one treatment arm | <u>E.0 Overall</u>                 | <u>Primary test</u> | <u>Any association on incident events from CFB.X in addition to from baseline X</u> | Only CFB.X at month 12                                                              | Cox regression (D-dimer and full clinical datasets)<br>Cox regression with IPW (exploratory biomarker dataset) |
|                      |                                                                                      | E.1 Tofacitinib 5 mg               | Subtest             | Test association (HR per unit CFB.X) on incident events in each arm                 |                                                                                     |                                                                                                                |
|                      |                                                                                      | E.1 Tofacitinib 10 mg              | Subtest             |                                                                                     |                                                                                     |                                                                                                                |
|                      |                                                                                      | E.1 TNFi                           | Subtest             |                                                                                     |                                                                                     |                                                                                                                |

†Hypotheses with names of the form \*.\*.bl were assessed at baseline, whereas those with names of the form \*.\*.12m were assessed at month 12. Hypotheses of the form \*.0.\* were global tests from full statistical models run across the cohort, possibly assessing multiple effects at once, and were typically assessed via comparison with a null model via ANOVA. Hypotheses of the form \*.1.\*, \*.2.\*, etc. were subtests of the corresponding \*.0.\* hypotheses, and were assessed by contrasts within that full model. Hypotheses and contrasts not shown in the table either are subsets of those shown (eg, Hypothesis B.0 is a sub-hypothesis of Hypothesis A.0) or can be partially inferred by the displayed contrasts.

ANOVA, analysis of variance; BID, twice daily; bl, baseline; CFB, change from baseline; ctrl, control; EOS, end of study; HR, hazard ratio; IPW, inverse probability weighting; TNFi, tumour necrosis factor inhibitor.

**Table S 4** Patient demographics and baseline disease characteristics (exploratory biomarker dataset\*)

| Biomarker subpopulation (N=285)              | Matched controls (n=228)          |                                                  |                | VTE cases (n=57)                  |                                                 |                |
|----------------------------------------------|-----------------------------------|--------------------------------------------------|----------------|-----------------------------------|-------------------------------------------------|----------------|
|                                              | Tofacitinib<br>5 mg BID<br>(N=57) | Tofacitinib<br>10 mg BID<br>(N=117) <sup>†</sup> | TNFi<br>(N=54) | Tofacitinib<br>5 mg BID<br>(N=14) | Tofacitinib<br>10 mg BID<br>(N=30) <sup>†</sup> | TNFi<br>(N=13) |
| Age (years), mean (SD)                       | 65.8 (6)                          | 63.2 (6)                                         | 61.1 (4)       | 65.8 (7)                          | 64 (6)                                          | 61.1 (5)       |
| Female sex, n (%)                            | 47 (82.5)                         | 72 (61.5)                                        | 53 (98.1)      | 12 (85.7)                         | 18 (60)                                         | 13 (100)       |
| White race, n (%)                            | 47 (82.5)                         | 91 (77.8)                                        | 45 (83.3)      | 14 (100)                          | 25 (83.3)                                       | 11 (84.6)      |
| BMI (kg/m <sup>2</sup> ), mean (SD)          | 29.6 (6)                          | 30.3 (6)                                         | 29.9 (7)       | 31.5 (8)                          | 33.5 (7)                                        | 35.2 (10)      |
| Current smoker, n (%)                        | 20 (35.1)                         | 27 (23.1)                                        | 12 (22.2)      | 4 (28.6)                          | 4 (13.3)                                        | 1 (7.7)        |
| Hypertension at baseline, n (%)              | 37 (64.9)                         | 81 (69.2)                                        | 38 (70.4)      | 11 (78.6)                         | 23 (76.7)                                       | 12 (92.3)      |
| Diabetes mellitus at baseline, n (%)         | 8 (14.0)                          | 30 (25.6)                                        | 7 (13.0)       | 1 (7.1)                           | 6 (20.0)                                        | 3 (23.1)       |
| Coronary heart disease at baseline, n (%)    | 4 (7.0)                           | 7 (6.0)                                          | 3 (5.6)        | 1 (7.1)                           | 3 (10.0)                                        | 1 (7.7)        |
| Extra-articular disease <sup>‡</sup> , n (%) | 22 (38.6)                         | 43 (36.8)                                        | 20 (37)        | 3 (21.4)                          | 11 (36.7)                                       | 5 (38.5)       |
| Baseline HDL-C <40 mg/dL, n (%)              | 5 (8.8)                           | 19 (16.2)                                        | 5 (9.3)        | 0 (0)                             | 6 (20.0)                                        | 1 (7.7)        |
| Previous VTE (DVT or PE), n (%)              | 3 (5.3)                           | 5 (4.3)                                          | 0 (0)          | 1 (7.1)                           | 3 (10.0)                                        | 3 (23.1)       |
| Oestrogen replacement at baseline, n (%)     | 2 (3.5)                           | 2 (1.7)                                          | 2 (3.7)        | 2 (14.3)                          | 1 (3.3)                                         | 0 (0)          |



| Biomarker subpopulation (N=285) | Matched controls (n=228)          |                                                  |                | VTE cases (n=57)                  |                                                 |                |
|---------------------------------|-----------------------------------|--------------------------------------------------|----------------|-----------------------------------|-------------------------------------------------|----------------|
|                                 | Tofacitinib<br>5 mg BID<br>(N=57) | Tofacitinib<br>10 mg BID<br>(N=117) <sup>†</sup> | TNFi<br>(N=54) | Tofacitinib<br>5 mg BID<br>(N=14) | Tofacitinib<br>10 mg BID<br>(N=30) <sup>†</sup> | TNFi<br>(N=13) |
| Aspirin at baseline, n (%)      | 14 (24.6)                         | 29 (24.8)                                        | 3 (5.6)        | 1 (7.1)                           | 11 (36.7)                                       | 2 (15.4)       |
| Genotyping                      | n=47                              | n=91                                             | n=45           | n=14                              | n=25                                            | n=11           |
| F2 risk allele carriers, n (%)  | 0                                 | 3 (3.3)                                          | 0              | 2 (14.3)                          | 2 (8.0)                                         | 0              |
| F5 risk allele carriers, n (%)  | 3 (6.4)                           | 1 (1.1)                                          | 1 (2.2)        | 0                                 | 5 (20.0)                                        | 2 (18.2)       |

\*Data obtained from the unplanned interim 22 February 2019, data cut; data had not been subject to all source verification and adjudication activities associated with a final dataset

in a prospectively defined interim analysis or at study completion. <sup>†</sup>For patients assigned to receive tofacitinib at a dose of 10 mg BID who had their dose reduced to 5 mg BID, the data collected after patients had been switched to 5 mg BID were counted in the arm receiving 10 mg BID. <sup>‡</sup>Includes nodules, Sjögren's syndrome, anaemia of chronic disease, pulmonary manifestations, and other. BID, twice daily; BMI, body mass index; DVT, deep vein thrombosis; F2, factor II; F5, factor V; HDL-C, high-density lipoprotein cholesterol; n, number of patients meeting baseline criteria; N, number of patients in each treatment arm in the biomarker subpopulation; PE, pulmonary embolism; SD, standard deviation; TNFi, tumour necrosis factor inhibitor; VTE, venous thromboembolism.

**Table S 5** Key statistical comparisons\* for Tier 1 and 2 biomarkers and VTE

(exploratory biomarker dataset)

| Biomarker name                                 | Sub-hypothesis name                | P-value type      | Effect size type | Effect size  | 95% CI         | P value  |
|------------------------------------------------|------------------------------------|-------------------|------------------|--------------|----------------|----------|
| <b>Tier 1</b>                                  |                                    |                   |                  |              |                |          |
| CRP<br>(assessed in the full clinical dataset) | A.1.bl Tofacitinib 5 mg            | Contrast<br>(X)   | HR               | 0.769        | 0.476, 1.242   | 0.283    |
|                                                | A.1.bl Tofacitinib 10 mg           |                   |                  | 0.962        | 0.684, 1.352   | 0.822    |
|                                                | A.1.bl TNFi                        |                   |                  | 0.609        | 0.349, 1.064   | 0.081    |
|                                                | A.1.12m Tofacitinib 5 mg           |                   |                  | 1.222        | 0.735, 2.033   | 0.439    |
|                                                | A.1.12m Tofacitinib 10 mg          |                   |                  | 1.160        | 0.830, 1.620   | 0.385    |
|                                                | A.1.12m TNFi                       |                   |                  | 1.142        | 0.576, 2.261   | 0.704    |
|                                                | B.0.bl Overall                     | Interaction       | NA               |              |                | 0.371    |
|                                                | B.0.12m Overall                    |                   |                  |              |                | 0.982    |
|                                                | D.2.ctrl Tofacitinib 5 mg vs TNFi  | Contrast<br>(Arm) | DeltaLog         | -0.173       | -0.266, -0.080 | 2.70e-04 |
|                                                | D.2.ctrl Tofacitinib 10 mg vs TNFi |                   |                  | -0.324       | -0.418, -0.23  | 1.51e-11 |
|                                                | D.3.case Tofacitinib 5 mg vs TNFi  |                   |                  | -0.182       | -1.329, 0.964  | 0.755    |
|                                                | D.3.case Tofacitinib 10 mg vs TNFi |                   |                  | -0.365       | -1.389, 0.659  | 0.485    |
|                                                | E.1 Tofacitinib 5 mg               | Contrast<br>(CFB) | HR               | 1.196        | 0.704, 2.032   | 0.508    |
|                                                | E.1 Tofacitinib 10 mg              |                   |                  | 1.172        | 0.831, 1.655   | 0.366    |
| E.1 TNFi                                       | 1.276                              |                   |                  | 0.620, 2.625 | 0.508          |          |
| TPO                                            | A.1.bl Tofacitinib 5 mg            | Contrast<br>(X)   | HR               | 1.259        | 0.630, 2.514   | 0.514    |
|                                                | A.1.bl Tofacitinib 10 mg           |                   |                  | 1.555        | 0.913, 2.649   | 0.105    |
|                                                | A.1.bl TNFi                        |                   |                  | 1.108        | 0.578, 2.124   | 0.758    |
|                                                | A.1.12m Tofacitinib 5 mg           |                   |                  | 1.313        | 0.668, 2.581   | 0.429    |
|                                                | A.1.12m Tofacitinib 10 mg          |                   |                  | 1.752        | 1.160, 2.645   | 0.008    |
|                                                | A.1.12m TNFi                       |                   |                  | 0.838        | 0.419, 1.678   | 0.618    |
|                                                | B.0.bl Overall                     | Interaction       | NA               |              |                | 0.582    |
|                                                | B.0.12m Overall                    |                   |                  |              |                | 0.175    |
|                                                | D.2.ctrl Tofacitinib 5 mg vs TNFi  | Contrast<br>(Arm) | DeltaLog         | 0.096        | -0.013, 0.204  | 0.085    |
|                                                | D.2.ctrl Tofacitinib 10 mg vs TNFi |                   |                  | 0.083        | -0.012, 0.177  | 0.087    |
|                                                | D.3.case Tofacitinib 5 mg vs TNFi  |                   |                  | 0.242        | -0.035, 0.518  | 0.086    |
|                                                | D.3.case Tofacitinib 10 mg vs TNFi |                   |                  | 0.319        | 0.080, 0.559   | 0.009    |

| Biomarker name                     | Sub-hypothesis name                | P-value type         | Effect size type | Effect size   | 95% CI        | P value      |
|------------------------------------|------------------------------------|----------------------|------------------|---------------|---------------|--------------|
|                                    | E.1 Tofacitinib 5 mg               | Contrast (CFB)       | HR               | 1.195         | 0.546, 2.615  | 0.656        |
|                                    | E.1 Tofacitinib 10 mg              |                      |                  | 1.571         | 0.914, 2.700  | 0.102        |
|                                    | E.1 TNFi                           |                      |                  | 0.587         | 0.157, 2.195  | 0.428        |
| <b>Tier 2</b>                      |                                    |                      |                  |               |               |              |
| ApoCIII                            | A.1.bl Tofacitinib 5 mg            | Contrast (X)         | HR               | 0.809         | 0.458, 1.429  | 0.465        |
|                                    | A.1.bl Tofacitinib 10 mg           |                      |                  | 1.090         | 0.821, 1.447  | 0.552        |
|                                    | A.1.bl TNFi                        |                      |                  | 1.164         | 0.690, 1.965  | 0.569        |
|                                    | A.1.12m Tofacitinib 5 mg           |                      |                  | 0.885         | 0.415, 1.891  | 0.753        |
|                                    | A.1.12m Tofacitinib 10 mg          |                      |                  | 0.915         | 0.594, 1.407  | 0.684        |
|                                    | A.1.12m TNFi                       |                      |                  | 1.115         | 0.469, 2.652  | 0.805        |
|                                    | B.0.bl Overall                     | Interaction          | NA               |               |               | 0.551        |
|                                    | B.0.12m Overall                    |                      |                  |               |               | 0.901        |
|                                    | D.2.ctrl Tofacitinib 5 mg vs TNFi  | Contrast (Arm)       | DeltaLog         | 0.083         | -0.058, 0.223 | 0.248        |
|                                    | D.2.ctrl Tofacitinib 10 mg vs TNFi |                      |                  | 0.057         | -0.064, 0.178 | 0.358        |
|                                    | D.3.case Tofacitinib 5 mg vs TNFi  |                      |                  | 0.056         | -0.301, 0.413 | 0.759        |
|                                    | D.3.case Tofacitinib 10 mg vs TNFi |                      |                  | -0.042        | -0.352, 0.268 | 0.791        |
|                                    | AT                                 | E.1 Tofacitinib 5 mg | Contrast (CFB)   | HR            | 1.223         | 0.588, 2.543 |
| E.1 Tofacitinib 10 mg              |                                    | 0.860                |                  |               | 0.367, 2.018  | 0.729        |
| E.1 TNFi                           |                                    | 1.263                |                  |               | 0.503, 3.172  | 0.619        |
| A.1.bl Tofacitinib 5 mg            |                                    | Contrast (X)         | HR               | 0.616         | 0.225, 1.688  | 0.346        |
| A.1.bl Tofacitinib 10 mg           |                                    |                      |                  | 0.883         | 0.61, 1.279   | 0.510        |
| A.1.bl TNFi                        |                                    |                      |                  | 0.624         | 0.283, 1.373  | 0.241        |
| A.1.12m Tofacitinib 5 mg           |                                    |                      |                  | 1.185         | 0.733, 1.915  | 0.488        |
| A.1.12m Tofacitinib 10 mg          |                                    |                      |                  | 0.983         | 0.594, 1.626  | 0.946        |
| A.1.12m TNFi                       |                                    |                      |                  | 1.006         | 0.598, 1.691  | 0.982        |
| B.0.bl Overall                     |                                    | Interaction          | NA               |               |               | 0.444        |
| B.0.12m Overall                    |                                    |                      |                  |               |               | 0.823        |
| D.2.ctrl Tofacitinib 5 mg vs TNFi  |                                    | Contrast (Arm)       | DeltaLog         | 0.024         | -0.06, 0.108  | 0.577        |
| D.2.ctrl Tofacitinib 10 mg vs TNFi |                                    |                      |                  | 0.009         | -0.064, 0.083 | 0.799        |
| D.3.case Tofacitinib 5 mg vs TNFi  | 0.031                              |                      |                  | -0.182, 0.244 | 0.776         |              |
| D.3.case Tofacitinib 10 mg vs TNFi |                                    |                      | 0.011            | -0.174, 0.195 | 0.910         |              |

| Biomarker name                     | Sub-hypothesis name                | P-value type   | Effect size type | Effect size   | 95% CI         | P value  |
|------------------------------------|------------------------------------|----------------|------------------|---------------|----------------|----------|
| Factor VIII                        | E.1 Tofacitinib 5 mg               | Contrast (CFB) | HR               | 1.210         | 0.791, 1.85    | 0.379    |
|                                    | E.1 Tofacitinib 10 mg              |                |                  | 1.114         | 0.677, 1.833   | 0.670    |
|                                    | E.1 TNFi                           |                |                  | 1.079         | 0.632, 1.841   | 0.780    |
|                                    | A.1.bl Tofacitinib 5 mg            | Contrast (X)   | HR               | 0.766         | 0.500, 1.174   | 0.221    |
|                                    | A.1.bl Tofacitinib 10 mg           |                |                  | 1.226         | 0.883, 1.703   | 0.224    |
|                                    | A.1.bl TNFi                        |                |                  | 1.446         | 0.853, 2.451   | 0.170    |
|                                    | A.1.12m Tofacitinib 5 mg           |                |                  | 0.772         | 0.521, 1.144   | 0.197    |
|                                    | A.1.12m Tofacitinib 10 mg          |                |                  | 1.097         | 0.699, 1.721   | 0.688    |
|                                    | A.1.12m TNFi                       |                |                  | 0.943         | 0.647, 1.376   | 0.762    |
|                                    | B.0.bl Overall                     | Interaction    | NA               |               |                | 0.188    |
|                                    | B.0.12m Overall                    |                |                  |               |                | 0.649    |
|                                    | D.2.ctrl Tofacitinib 5 mg vs TNFi  | Contrast (Arm) | DeltaLog         | -0.090        | -0.235, 0.055  | 0.226    |
|                                    | D.2.ctrl Tofacitinib 10 mg vs TNFi |                |                  | -0.301        | -0.428, -0.174 | 3.31e-06 |
|                                    | D.3.case Tofacitinib 5 mg vs TNFi  |                |                  | -0.093        | -0.458, 0.271  | 0.616    |
| D.3.case Tofacitinib 10 mg vs TNFi |                                    |                | -0.180           | -0.496, 0.136 | 0.263          |          |
| Leptin                             | E.1 Tofacitinib 5 mg               | Contrast (CFB) | HR               | 0.736         | 0.282, 1.925   | 0.532    |
|                                    | E.1 Tofacitinib 10 mg              |                |                  | 1.089         | 0.439, 2.703   | 0.855    |
|                                    | E.1 TNFi                           |                |                  | 0.627         | 0.225, 1.752   | 0.373    |
|                                    | A.1.bl Tofacitinib 5 mg            | Contrast (X)   | HR               | 2.064         | 0.893, 4.770   | 0.090    |
|                                    | A.1.bl Tofacitinib 10 mg           |                |                  | 1.500         | 1.029, 2.187   | 0.035    |
|                                    | A.1.bl TNFi                        |                |                  | 2.495         | 0.956, 6.508   | 0.062    |
|                                    | A.1.12m Tofacitinib 5 mg           |                |                  | 2.986         | 1.172, 7.608   | 0.022    |
|                                    | A.1.12m Tofacitinib 10 mg          |                |                  | 1.123         | 0.721, 1.75    | 0.607    |
|                                    | A.1.12m TNFi                       |                |                  | 2.431         | 1.02, 5.794    | 0.045    |
|                                    | B.0.bl Overall                     | Interaction    | NA               |               |                | 0.357    |
|                                    | B.0.12m Overall                    |                |                  |               |                | 0.045    |
|                                    | D.2.ctrl Tofacitinib 5 mg vs TNFi  | Contrast (Arm) | DeltaLog         | 0.218         | -0.021, 0.457  | 0.073    |
|                                    | D.2.ctrl Tofacitinib 10 mg vs TNFi |                |                  | 0.222         | 0.015, 0.429   | 0.036    |
|                                    | D.3.case Tofacitinib 5 mg vs TNFi  |                |                  | 0.446         | -0.164, 1.057  | 0.152    |
| D.3.case Tofacitinib 10 mg vs TNFi |                                    |                | 0.153            | -0.379, 0.686 | 0.573          |          |

| Biomarker name | Sub-hypothesis name                | P-value type   | Effect size type | Effect size | 95% CI        | P value |
|----------------|------------------------------------|----------------|------------------|-------------|---------------|---------|
| PAI-1          | E.1 Tofacitinib 5 mg               | Contrast (CFB) | HR               | 1.881       | 0.588, 6.012  | 0.287   |
|                | E.1 Tofacitinib 10 mg              |                |                  | 0.694       | 0.269, 1.795  | 0.452   |
|                | E.1 TNFi                           |                |                  | 0.982       | 0.169, 5.695  | 0.984   |
|                | A.1.bl Tofacitinib 5 mg            | Contrast (X)   | HR               | 2.167       | 0.896, 5.244  | 0.086   |
|                | A.1.bl Tofacitinib 10 mg           |                |                  | 0.915       | 0.545, 1.534  | 0.735   |
|                | A.1.bl TNFi                        |                |                  | 0.937       | 0.628, 1.400  | 0.752   |
|                | A.1.12m Tofacitinib 5 mg           |                |                  | 1.300       | 0.295, 5.718  | 0.729   |
|                | A.1.12m Tofacitinib 10 mg          |                |                  | 0.955       | 0.527, 1.729  | 0.879   |
|                | A.1.12m TNFi                       |                |                  | 1.379       | 0.745, 2.552  | 0.307   |
|                | B.0.bl Overall                     | Interaction    | NA               |             |               | 0.075   |
|                | B.0.12m Overall                    |                |                  |             |               | 0.635   |
|                | D.2.ctrl Tofacitinib 5 mg vs TNFi  | Contrast (Arm) | DeltaLog         | 0.224       | 0.008, 0.440  | 0.042   |
|                | D.2.ctrl Tofacitinib 10 mg vs TNFi |                |                  | 0.114       | -0.072, 0.300 | 0.231   |
|                | D.3.case Tofacitinib 5 mg vs TNFi  |                |                  | 0.081       | -0.465, 0.627 | 0.771   |
|                | D.3.case Tofacitinib 10 mg vs TNFi |                |                  | -0.020      | -0.493, 0.453 | 0.934   |
|                | E.1 Tofacitinib 5 mg               | Contrast (CFB) | HR               | 0.952       | 0.213, 4.255  | 0.948   |
|                | E.1 Tofacitinib 10 mg              |                |                  | 0.910       | 0.469, 1.768  | 0.781   |
|                | E.1 TNFi                           |                |                  | 1.366       | 0.624, 2.991  | 0.436   |
| Protein C      | A.1.bl Tofacitinib 5 mg            | Contrast (X)   | HR               | 0.478       | 0.202, 1.129  | 0.092   |
|                | A.1.bl Tofacitinib 10 mg           |                |                  | 1.168       | 0.792, 1.721  | 0.433   |
|                | A.1.bl TNFi                        |                |                  | 1.383       | 0.686, 2.787  | 0.365   |
|                | A.1.12m Tofacitinib 5 mg           |                |                  | 0.746       | 0.228, 2.446  | 0.629   |
|                | A.1.12m Tofacitinib 10 mg          |                |                  | 1.106       | 0.681, 1.795  | 0.684   |
|                | A.1.12m TNFi                       |                |                  | 0.718       | 0.406, 1.268  | 0.253   |
|                | B.0.bl Overall                     | Interaction    | NA               |             |               | 0.021   |
|                | B.0.12m Overall                    |                |                  |             |               | 0.447   |
|                | D.2.ctrl Tofacitinib 5 mg vs TNFi  | Contrast (Arm) | DeltaLog         | -0.042      | -0.141, 0.056 | 0.403   |
|                | D.2.ctrl Tofacitinib 10 mg vs TNFi |                |                  | -0.082      | -0.167, 0.003 | 0.057   |
|                | D.3.case Tofacitinib 5 mg vs TNFi  |                |                  | 0.211       | -0.033, 0.454 | 0.090   |
|                | D.3.case Tofacitinib 10 mg vs TNFi |                |                  | 0.025       | -0.187, 0.237 | 0.817   |
|                |                                    |                |                  |             |               |         |

| Biomarker name                     | Sub-hypothesis name                | P-value type   | Effect size type | Effect size   | 95% CI        | P value |
|------------------------------------|------------------------------------|----------------|------------------|---------------|---------------|---------|
| TAT                                | E.1 Tofacitinib 5 mg               | Contrast (CFB) | HR               | 4.201         | 0.387, 45.633 | 0.238   |
|                                    | E.1 Tofacitinib 10 mg              |                |                  | 0.909         | 0.422, 1.960  | 0.808   |
|                                    | E.1 TNFi                           |                |                  | 0.429         | 0.180, 1.020  | 0.055   |
|                                    | A.1.bl Tofacitinib 5 mg            | Contrast (X)   | HR               | 0.573         | 0.281, 1.168  | 0.126   |
|                                    | A.1.bl Tofacitinib 10 mg           |                |                  | 1.115         | 0.839, 1.481  | 0.454   |
|                                    | A.1.bl TNFi                        |                |                  | 1.345         | 0.717, 2.525  | 0.356   |
|                                    | A.1.12m Tofacitinib 5 mg           |                |                  | 1.535         | 0.815, 2.891  | 0.185   |
|                                    | A.1.12m Tofacitinib 10 mg          |                |                  | 1.624         | 0.972, 2.712  | 0.064   |
|                                    | A.1.12m TNFi                       |                |                  | 0.667         | 0.262, 1.701  | 0.397   |
|                                    | B.0.bl Overall                     | Interaction    | NA               |               |               | 0.139   |
|                                    | B.0.12m Overall                    |                |                  |               |               | 0.165   |
|                                    | D.2.ctrl Tofacitinib 5 mg vs TNFi  | Contrast (Arm) | DeltaLog         | -0.216        | -0.553, 0.121 | 0.209   |
|                                    | D.2.ctrl Tofacitinib 10 mg vs TNFi |                |                  | -0.094        | -0.384, 0.196 | 0.526   |
|                                    | D.3.case Tofacitinib 5 mg vs TNFi  |                |                  | 0.271         | -0.583, 1.126 | 0.533   |
| D.3.case Tofacitinib 10 mg vs TNFi | 0.516                              |                |                  | -0.222, 1.255 | 0.171         |         |
| TFPI                               | E.1 Tofacitinib 5 mg               | Contrast (CFB) | HR               | 5.674         | 0.856, 37.612 | 0.072   |
|                                    | E.1 Tofacitinib 10 mg              |                |                  | 1.662         | 0.992, 2.783  | 0.054   |
|                                    | E.1 TNFi                           |                |                  | 0.645         | 0.276, 1.509  | 0.312   |
|                                    | A.1.bl Tofacitinib 5 mg            | Contrast (X)   | HR               | 0.719         | 0.328, 1.577  | 0.411   |
|                                    | A.1.bl Tofacitinib 10 mg           |                |                  | 0.829         | 0.391, 1.759  | 0.625   |
|                                    | A.1.bl TNFi                        |                |                  | 1.149         | 0.787, 1.677  | 0.473   |
|                                    | A.1.12m Tofacitinib 5 mg           |                |                  | 1.303         | 0.729, 2.331  | 0.372   |
|                                    | A.1.12m Tofacitinib 10 mg          |                |                  | 1.221         | 0.662, 2.254  | 0.523   |
|                                    | A.1.12m TNFi                       |                |                  | 1.080         | 0.474, 2.457  | 0.855   |
|                                    | B.0.bl Overall                     | Interaction    | NA               |               |               | 0.425   |
|                                    | B.0.12m Overall                    |                |                  |               |               | 0.938   |
|                                    | D.2.ctrl Tofacitinib 5 mg vs TNFi  | Contrast (Arm) | DeltaLog         | 0.053         | -0.033, 0.138 | 0.229   |
|                                    | D.2.ctrl Tofacitinib 10 mg vs TNFi |                |                  | 0.076         | 0.003, 0.149  | 0.041   |
|                                    | D.3.case Tofacitinib 5 mg vs TNFi  |                |                  | 0.180         | -0.035, 0.395 | 0.102   |
| D.3.case Tofacitinib 10 mg vs TNFi | 0.158                              |                |                  | -0.028, 0.344 | 0.095         |         |

| Biomarker name | Sub-hypothesis name   | P-value type   | Effect size type | Effect size | 95% CI       | P value |
|----------------|-----------------------|----------------|------------------|-------------|--------------|---------|
|                | E.1 Tofacitinib 5 mg  | Contrast (CFB) | HR               | 1.779       | 0.706, 4.484 | 0.222   |
|                | E.1 Tofacitinib 10 mg |                |                  | 1.257       | 0.663, 2.383 | 0.484   |
|                | E.1 TNFi              |                |                  | 0.998       | 0.311, 3.207 | 0.997   |

For patients assigned to receive tofacitinib at a dose of 10 mg BID who had their dose reduced to 5 mg BID, the data collected after patients had been switched to 5 mg BID were counted in the arm receiving 10 mg BID. \*For hypothesis definitions, see online supplemental table 3.

ApoCIII, apolipoprotein C-III; AT, antithrombin; BID, twice daily; CFB, change from baseline; CI, confidence interval; CRP, C-reactive protein; HR, hazard ratio; PAI-1, plasminogen activator inhibitor-1; TAT, thrombin-antithrombin complex; TFPI, tissue factor pathway inhibitor; TNFi, tumour necrosis factor inhibitor; TPO, thrombopoietin; VTE, venous thromboembolism.

**Table S 6** Key statistical comparisons\* for D-dimer and VTE (D-dimer dataset)

| Sub-hypothesis name                    | P-value type   | Effect size type | Effect size | 95% CI         | P value  |
|----------------------------------------|----------------|------------------|-------------|----------------|----------|
| A.1.bl Tofacitinib 5 mg                | Contrast (X)   | HR               | 0.943       | 0.548, 1.621   | 0.831    |
| A.1.bl Tofacitinib 10 mg               |                |                  | 1.101       | 0.785, 1.544   | 0.576    |
| A.1.bl TNFi                            |                |                  | 1.193       | 0.656, 2.170   | 0.562    |
| A.1.12m Tofacitinib 5 mg               |                |                  | 4.676       | 2.098, 10.421  | 1.61e-04 |
| A.1.12m Tofacitinib 10 mg              |                |                  | 1.922       | 1.283, 2.880   | 0.002    |
| A.1.12m TNFi                           |                |                  | 1.510       | 0.695, 3.284   | 0.298    |
| B.0.bl Overall                         | Interaction    | NA               |             |                | 0.833    |
| B.0.12m Overall                        |                |                  |             |                | 0.088    |
| C.2 ctrl Tofacitinib 5 mg vs TNFi      | Contrast (X)   | Delta            | 0.044       | -0.018, 0.105  | 0.165    |
| C.2.ctrl Tofacitinib 10 mg vs TNFi     |                | Log              | 0.050       | -0.012, 0.112  | 0.116    |
| C.3 case Tofacitinib 5 mg vs TNFi      |                |                  | -0.138      | -0.794, 0.517  | 0.679    |
| C.3.case Tofacitinib 10 mg vs TNFi     |                |                  | -0.002      | -0.583, 0.579  | 0.995    |
| D.2.ctrl.12m Tofacitinib 5 mg vs TNFi  | Contrast (CFB) | Delta            | -0.075      | -0.131, -0.019 | 0.009    |
| D.2.ctrl.12m Tofacitinib 10 mg vs TNFi |                | CFB              | -0.045      | -0.102, 0.012  | 0.119    |
| D.3.case.12m Tofacitinib 5 mg vs TNFi  |                | Log              | 0.728       | -0.049, 1.505  | 0.066    |
| D.3.case.12m Tofacitinib 10 mg vs TNFi |                |                  | 0.119       | -0.529, 0.768  | 0.719    |
| D.2.ctrl.eos Tofacitinib 5 mg vs TNFi  |                |                  | 0.006       | -0.079, 0.091  | 0.892    |
| D.2.ctrl.eos Tofacitinib 10 mg vs TNFi |                |                  | -0.009      | -0.097, 0.078  | 0.832    |
| E.1 Tofacitinib 5 mg                   | Contrast (CFB) | HR               | 5.774       | 2.348, 14.203  | 1.34e-04 |
| E.1 Tofacitinib 10 mg                  |                |                  | 1.966       | 1.256, 3.078   | 0.003    |
| E.1 TNFi                               |                |                  | 1.403       | 0.542, 3.627   | 0.485    |

For patients assigned to receive tofacitinib at a dose of 10 mg BID who had their dose reduced to 5 mg BID, the data collected after patients had been switched to 5 mg BID were counted in the arm receiving 10 mg BID. \*For hypothesis definitions, see Supplementary Table 3.

BID, twice daily; CFB, change from baseline; CI, confidence interval; HR, hazard ratio; TNFi, tumour necrosis factor inhibitor; VTE, venous thromboembolism.



**Table S 7** Levels of D-dimer in PE cases and controls using a cutoff of 2×ULN at baseline and month 12 (D-dimer dataset)

| Treatment arm          | ULN    | Baseline           |                    | Month 12           |                    |
|------------------------|--------|--------------------|--------------------|--------------------|--------------------|
|                        |        | Controls,<br>n (%) | PE cases,<br>n (%) | Controls,<br>n (%) | PE cases,<br>n (%) |
| Tofacitinib 5 mg BID   | ≥2×ULN | 618 (50)           | 5 (56)             | 282 (26)           | 5 (100)            |
|                        | <2×ULN | 625 (50)           | 4 (44)             | 798 (74)           | 0 (0)              |
| Tofacitinib 10 mg BID* | ≥2×ULN | 602 (50)           | 15 (71)            | 290 (29)           | 9 (75)             |
|                        | <2×ULN | 592 (50)           | 6 (29)             | 717 (71)           | 3 (25)             |
| TNFi                   | ≥2×ULN | 599 (48)           | 1 (33)             | 316 (30)           | 0 (0)              |
|                        | <2×ULN | 642 (52)           | 2 (67)             | 740 (70)           | 1 (100)            |

\*For patients assigned to receive tofacitinib at a dose of 10 mg BID who had their dose reduced to 5 mg BID, the data collected after patients had been switched to 5 mg BID were counted in the arm receiving 10 mg BID. BID, twice daily; PE, pulmonary embolism; TNFi, tumour necrosis factor inhibitor; ULN, upper limit of normal.

**Table S 8** VTE case counts by binary D-dimer status, age, and treatment arm (D-dimer dataset)

| Age             | Treatment              | D-dimer status  |                |                 |                |
|-----------------|------------------------|-----------------|----------------|-----------------|----------------|
|                 |                        | <2×ULN          |                | ≥2×ULN          |                |
|                 |                        | VTE cases/total | Proportion (%) | VTE cases/total | Proportion (%) |
| <b>Baseline</b> |                        |                 |                |                 |                |
| ≥65 years       | Tofacitinib 5 mg BID   | 3/160           | 1.9            | 4/177           | 2.3            |
|                 | Tofacitinib 10 mg BID* | 3/175           | 1.7            | 10/220          | 4.5            |
|                 | TNFi                   | 0/188           | 0              | 3/197           | 1.5            |
| <65 years       | Tofacitinib 5 mg BID   | 2/470           | 0.4            | 5/450           | 1.1            |
|                 | Tofacitinib 10 mg BID* | 7/427           | 1.6            | 11/403          | 2.7            |
|                 | TNFi                   | 3/457           | 0.7            | 3/408           | 0.7            |
| <b>Month 12</b> |                        |                 |                |                 |                |
| ≥65 years       | Tofacitinib 5 mg BID   | 0/184           | 0              | 4/92            | 4.3            |
|                 | Tofacitinib 10 mg BID* | 2/178           | 1.1            | 6/123           | 4.9            |
|                 | TNFi                   | 2/205           | 1.0            | 0/118           | 0              |
| <65 years       | Tofacitinib 5 mg BID   | 0/614           | 0              | 2/196           | 1.0            |
|                 | Tofacitinib 10 mg BID* | 6/547           | 1.1            | 5/178           | 2.8            |
|                 | TNFi                   | 1/538           | 0.2            | 2/200           | 1.0            |

\*For patients assigned to receive tofacitinib at a dose of 10 mg BID who had their dose reduced to 5 mg BID, the data collected after patients had been switched to 5 mg BID were counted in the arm receiving 10 mg BID. BID, twice daily; TNFi, tumour necrosis factor inhibitor; ULN, upper limit of normal; VTE, venous thromboembolism.

**Table S 9** VTE case counts by binary D-dimer status, BMI, and treatment arm (D-dimer dataset)

| BMI                   | Treatment              | D-dimer status  |                |                 |                |
|-----------------------|------------------------|-----------------|----------------|-----------------|----------------|
|                       |                        | <2×ULN          |                | ≥2×ULN          |                |
|                       |                        | VTE cases/total | Proportion (%) | VTE cases/total | Proportion (%) |
| <b>Baseline</b>       |                        |                 |                |                 |                |
| ≥30 kg/m <sup>2</sup> | Tofacitinib 5 mg BID   | 3/273           | 1.1            | 3/242           | 1.2            |
|                       | Tofacitinib 10 mg BID* | 6/270           | 2.2            | 15/237          | 6.3            |
|                       | TNFi                   | 3/303           | 1.0            | 3/240           | 1.2            |
| <30 kg/m <sup>2</sup> | Tofacitinib 5 mg BID   | 2/354           | 0.6            | 5/382           | 1.3            |
|                       | Tofacitinib 10 mg BID* | 4/330           | 1.2            | 6/385           | 1.6            |
|                       | TNFi                   | 0/336           | 0              | 3/364           | 0.8            |
| <b>Month 12</b>       |                        |                 |                |                 |                |
| ≥30 kg/m <sup>2</sup> | Tofacitinib 5 mg BID   | 0/316           | 0              | 4/122           | 3.3            |
|                       | Tofacitinib 10 mg BID* | 4/286           | 1.4            | 9/132           | 6.8            |
|                       | TNFi                   | 2/325           | 0.6            | 0/135           | 0              |
| <30 kg/m <sup>2</sup> | Tofacitinib 5 mg BID   | 0/479           | 0              | 1/164           | 0.6            |
|                       | Tofacitinib 10 mg BID* | 4/436           | 0.9            | 2/169           | 1.2            |
|                       | TNFi                   | 1/414           | 0.2            | 2/183           | 1.1            |

\*For patients assigned to receive tofacitinib at a dose of 10 mg BID who had their dose reduced to 5 mg BID, the data collected after patients had been switched to 5 mg BID were counted in the arm receiving 10 mg BID. BID, twice daily; BMI, body mass index; TNFi, tumour necrosis factor inhibitor; ULN, upper limit of normal; VTE, venous thromboembolism.

**Table S 10** VTE case counts by binary D-dimer status, smoking status, and treatment arm  
(D-dimer dataset)

| Smoking status       | Treatment              | D-dimer status  |                |                 |                |
|----------------------|------------------------|-----------------|----------------|-----------------|----------------|
|                      |                        | <2×ULN          |                | ≥2×ULN          |                |
|                      |                        | VTE cases/total | Proportion (%) | VTE cases/total | Proportion (%) |
| <b>Baseline</b>      |                        |                 |                |                 |                |
| Current or ex-smoker | Tofacitinib 5 mg BID   | 1/330           | 0.3            | 6/291           | 2.1            |
|                      | Tofacitinib 10 mg BID* | 7/296           | 2.4            | 12/293          | 4.1            |
|                      | TNFi                   | 0/320           | 0              | 3/267           | 1.1            |
| Lifetime non-smoker  | Tofacitinib 5 mg BID   | 4/300           | 1.3            | 3/336           | 0.9            |
|                      | Tofacitinib 10 mg BID* | 3/306           | 1.0            | 9/330           | 2.7            |
|                      | TNFi                   | 3/325           | 0.9            | 3/338           | 0.9            |
| <b>Month 12</b>      |                        |                 |                |                 |                |
| Current or ex-smoker | Tofacitinib 5 mg BID   | 0/395           | 0              | 4/136           | 2.9            |
|                      | Tofacitinib 10 mg BID* | 5/347           | 1.4            | 7/139           | 5.0            |
|                      | TNFi                   | 2/347           | 0.6            | 0/126           | 0              |
| Lifetime non-smoker  | Tofacitinib 5 mg BID   | 0/403           | 0              | 2/152           | 1.3            |
|                      | Tofacitinib 10 mg BID* | 3/378           | 0.8            | 4/162           | 2.5            |
|                      | TNFi                   | 1/396           | 0.3            | 2/192           | 1.0            |

\*For patients assigned to receive tofacitinib at a dose of 10 mg BID who had their dose reduced to 5 mg BID, the data collected after patients had been switched to 5 mg BID were counted in the arm receiving 10 mg BID. BID, twice daily; TNFi, tumour necrosis factor inhibitor; ULN, upper limit of normal; VTE, venous thromboembolism.

**Table S 11** VTE case counts by binary D-dimer status, history of hypertension, and treatment arm (D-dimer dataset)

| History of hypertension | Treatment              | D-dimer status  |                |                 |                |
|-------------------------|------------------------|-----------------|----------------|-----------------|----------------|
|                         |                        | <2×ULN          |                | ≥2×ULN          |                |
|                         |                        | VTE cases/total | Proportion (%) | VTE cases/total | Proportion (%) |
| <b>Baseline</b>         |                        |                 |                |                 |                |
| Yes                     | Tofacitinib 5 mg BID   | 5/415           | 1.2            | 6/394           | 1.5            |
|                         | Tofacitinib 10 mg BID* | 5/400           | 1.2            | 19/403          | 4.7            |
|                         | TNFi                   | 3/434           | 0.7            | 5/398           | 1.3            |
| No                      | Tofacitinib 5 mg BID   | 0/215           | 0              | 3/233           | 1.3            |
|                         | Tofacitinib 10 mg BID* | 5/202           | 2.5            | 2/220           | 0.9            |
|                         | TNFi                   | 0/211           | 0              | 1/207           | 0.5            |
| <b>Month 12</b>         |                        |                 |                |                 |                |
| Yes                     | Tofacitinib 5 mg BID   | 0/500           | 0              | 4/190           | 2.1            |
|                         | Tofacitinib 10 mg BID* | 6/445           | 1.3            | 10/213          | 4.7            |
|                         | TNFi                   | 3/488           | 0.6            | 1/223           | 0.4            |
| No                      | Tofacitinib 5 mg BID   | 0/298           | 0              | 2/98            | 2              |
|                         | Tofacitinib 10 mg BID* | 2/280           | 0.7            | 1/88            | 1.1            |
|                         | TNFi                   | 0/255           | 0              | 1/95            | 1.1            |

\*For patients assigned to receive tofacitinib at a dose of 10 mg BID who had their dose reduced to 5 mg BID, the data collected after patients had been switched to 5 mg BID were counted in the arm receiving 10 mg BID. BID, twice daily; TNFi, tumour necrosis factor inhibitor; ULN, upper limit of normal; VTE, venous thromboembolism.

**Figure S 1** Effect of genotype on risk of VTE events or PE events: comparing carriers versus non-carriers of F2 and/or F5 risk alleles\* (**A**) and comparing tofacitinib 10 mg BID versus TNFi after removal of carriers of F2 and/or F5 (**B**) (exploratory biomarker dataset).

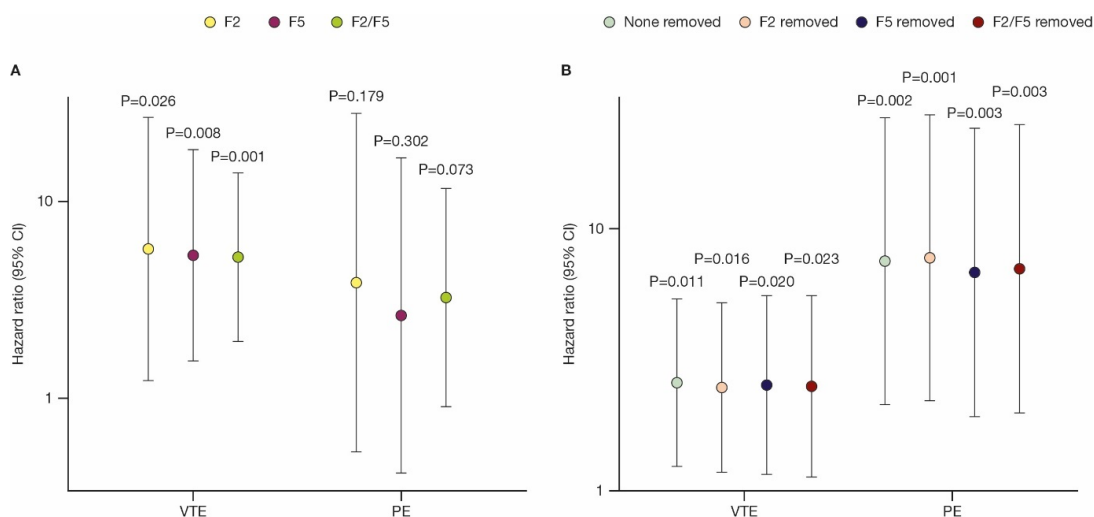

\*By standard practice for genetic analyses, data were analysed by ancestry, but only the number of white (Caucasian) patients in each group had sufficient patients to permit this analysis; therefore, results are shown for Caucasian patients only. BID, twice daily; CI, confidence interval; F2, factor II (prothrombin) G20210A/ rs1799963 mutation; F5, factor V Leiden R506Q/rs6025 mutation; HR, hazard ratio; PE, pulmonary embolism; TNFi, tumour necrosis factor inhibitor; VTE, venous thromboembolism.

**Figure S 2** D-dimer at baseline, month 12, and end of study by treatment arm in controls and PE cases (D-dimer dataset).

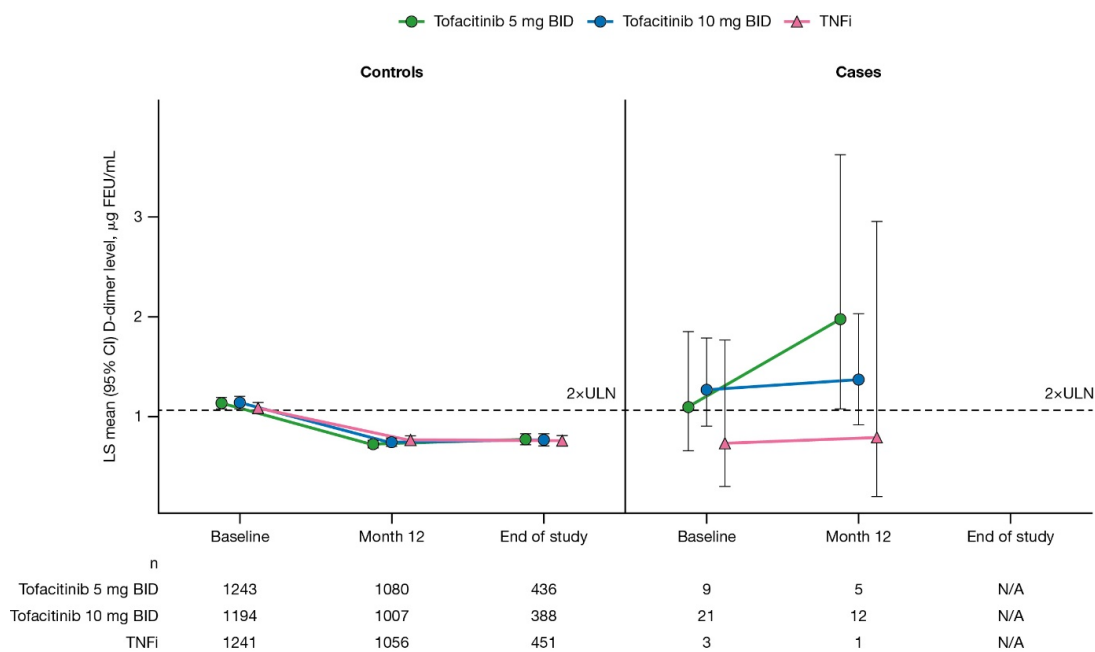

Normal assay range:  $<0.53 \mu\text{g FEU/mL}$ . For patients assigned to receive tofacitinib at a dose of 10 mg BID who had their dose reduced to 5 mg BID, the data collected after patients had been switched to 5 mg BID were counted in the arm receiving 10 mg BID. BID, twice daily; CI, confidence interval; FEU, fibrinogen equivalent units; LS, least squares; PE, pulmonary embolism; TNFi, tumour necrosis factor inhibitor; ULN, upper limit of normal.
