# Supplementary material
Source: HighWire-hosted journal article supplement (https://rmdopen.bmj.com/content/8/2/e002571)
Supplement: inline-supplementary-material-3 [file inline-supplementary-material-3.xlsx]

## Sheet: Association Tests
Association Tests for Continuous D-dimer Levels on VTE Events by Treatment Arms and Time
Sub-hypothesis names	p-value typea	p-value	Effect size type	Effect size	SE	Lower 95% CI	Upper 95% CI
A.bl.0 Overall, possible interaction	ANOVA	0.877881	NA
A.bl.1 Overall, no interaction	contrast (X)	0.572504	HR	1.07732	0.13196	0.8318	1.3953
A.bl.1 Tofacitinib 5 mg BID	contrast (X)	0.830681	HR	0.942587	0.276519	0.548212	1.62067
A.bl.1 Tofacitinib 10 mg BID	contrast (X)	0.576299	HR	1.10115	0.172434	0.785363	1.54391
A.bl.1 TNFi	contrast (X)	0.56224	HR	1.19337	0.305052	0.65632	2.16988
A.m12.0 Overall, possible interaction	ANOVA	3.22e-05	NA
A.m12.1 Overall, no interaction	contrast (X)	2.49e-06	HR	2.12028	0.159606	1.55073	2.89902
A.m12.1 Tofacitinib 5 mg BID	contrast (X)	0.000161396	HR	4.67639	0.408849	2.09844	10.4213
A.m12.1 Tofacitinib 10 mg BID	contrast (X)	0.00153724	HR	1.92205	0.206277	1.28287	2.87971
A.m12.1 TNFi	contrast (X)	0.298156	HR	1.51037	0.396344	0.694568	3.28437
B.bl.0 Interaction	interaction	0.833119	NA
B.bl.1 Tofacitinib 5 mg BID vs TNFi	contrast (X)	0.566651	HR	0.789851	0.411718	0.352444	1.77011
B.bl.1 Tofacitinib 10 mg BID vs TNFi	contrast (X)	0.81846	HR	0.922722	0.350404	0.464308	1.83373
B.m12.0 Interaction	interaction	0.0882969	NA
B.m12.1 Tofacitinib 5 mg BID vs TNFi	contrast (H.X)	0.0471665	HR	3.09619	0.569413	1.01424	9.45175
B.m12.1 Tofacitinib 10 mg BID vs TNFi	contrast (H.X)	0.589549	HR	1.27257	0.446792	0.530117	3.05487
E.0 Overall	ANOVA	4.84e-05	NA
E.1 Tofacitinib 5 mg BID	contrast (CFB)	0.00013435	HR	5.7744	0.459213	2.3476	14.2033
E.1 Tofacitinib 10 mg BID	contrast (CFB)	0.00311383	HR	1.96625	0.22871	1.25592	3.07835
E.1 TNFi	contrast (CFB)	0.485196	HR	1.40259	0.484717	0.542422	3.62678
F.0 Interaction	interaction	0.0581017	NA
F.1 Tofacitinib 5 mg BID vs TNFi	contrast (H.CFB)	0.0340445	HR	4.11696	0.667651	1.11243	15.2364
F.1 Tofacitinib 10 mg BID vs TNFi	contrast (H.CFB)	0.528473	HR	1.40188	0.535921	0.49038	4.00762
a. 'X' refers to a hazard ratio per increase by one SD of ln[D-dimer] at the timepoint being analyzed. 'CFB' refers to a hazard ratio per increase by one SD of CFB(ln[D-dimer]). 'H.*' refers to a ratio of hazard ratios described by *.
Abbreviations: BID = twice daily; bl = baseline; CFB = change from baseline at Month 12; HR = hazard ratio; ln = natural logarithm; NA = not applicable; m12 = Month 12 visit; SE = standard error of ln(HR); VTE = venous thromboembolism.

## Sheet: Hazard Ratios
VTE Hazard Ratios for Treatments and Binary D-dimer (≥2xULN) Status by Time and Risk Factor Status
Timepoint	Popul-ation	Sub-hypothesis names	p-value typea	p-value	Effect size type	Effect size	SE	Lower 95% CI	Upper 95% CI
Baseline	Full	A.0 Overall, possible interaction	ANOVA	0.129844	NA	NA	NA	NA	NA
Baseline	Full	A.1 All patients, no interaction	contrast (X)	0.0216099	HR	1.94175	0.288875	1.10231	3.42046
Baseline	Full	A.1 Tofacitinib 5 mg BID	contrast (X)	0.306618	HR	1.76876	0.557814	0.59273	5.27813
Baseline	Full	A.1 Tofacitinib 10 mg BID	contrast (X)	0.0826599	HR	1.94823	0.384293	0.917341	4.13763
Baseline	Full	A.1 TNFi	contrast (X)	0.259529	HR	2.21948	0.707113	0.55508	8.87457
Baseline	Full	B.0 Interaction [Tofacitinib 10 mg BID]	interaction	0.871333	NA	NA	NA	NA	NA
Baseline	Full	B.all.1 Tofacitinib 5 mg BID vs TNFi	contrast (H)	0.332114	HR	1.51343	0.427253	0.655064	3.49655
Baseline	Full	B.all.1 Tofacitinib 10 mg BID vs TNFi	contrast (H)	0.000599224	HR	3.66774	0.378668	1.74613	7.7041
Baseline	Full	B.lowDdim.2 Tofacitinib 5 mg BID vs TNFi	contrast (H)	0.457198	HR	1.72109	0.730301	0.41131	7.20173
Baseline	Full	B.lowDdim.2 Tofacitinib 10 mg BID vs TNFi	contrast (H)	0.0394631	HR	3.87947	0.658321	1.0676	14.0973
Baseline	Full	B.highDdim.3 Tofacitinib 5 mg BID vs TNFi	contrast (H)	0.548869	HR	1.37158	0.527079	0.488168	3.85364
Baseline	Full	B.highDdim.3 Tofacitinib 10 mg BID vs TNFi	contrast (H)	0.00812418	HR	3.40535	0.462943	1.37437	8.43761
Month12	Full	A.0 Overall, possible interaction	ANOVA	1.74e-05	NA	NA	NA	NA	NA
Month12	Full	A.1 All patients, no interaction	contrast (X)	4.38e-05	HR	4.70682	0.379078	2.23901	9.89461
Month12	Full	A.1 Tofacitinib 5 mg BID	contrast (X)	NA	HR	NA	NA	NA	NA
Month12	Full	A.1 Tofacitinib 10 mg BID	contrast (X)	0.00426611	HR	3.77446	0.464785	1.51785	9.386
Month12	Full	A.1 TNFi	contrast (X)	0.58847	HR	1.63873	0.912885	0.273815	9.80744
Month12	Full	B.0 Interaction [Tofacitinib 10 mg BID]	interaction	0.415357	NA	NA	NA	NA	NA
Month12	Full	B.all.1 Tofacitinib 5 mg BID vs TNFi	contrast (H)	0.799789	HR	1.166	0.605533	0.355849	3.82057
Month12	Full	B.all.1 Tofacitinib 10 mg BID vs TNFi	contrast (H)	0.00495762	HR	4.10542	0.502641	1.53288	10.9953
Month12	Full	B.lowDdim.2 Tofacitinib 5 mg BID vs TNFi	contrast (H)	NA	HR	NA	NA	NA	NA
Month12	Full	B.lowDdim.2 Tofacitinib 10 mg BID vs TNFi	contrast (H)	0.129042	HR	2.79444	0.677012	0.741345	10.5334
Month12	Full	B.highDdim.3 Tofacitinib 5 mg BID vs TNFi	contrast (H)	0.145337	HR	3.28375	0.8165	0.662773	16.2696
Month12	Full	B.highDdim.3 Tofacitinib 10 mg BID vs TNFi	contrast (H)	0.0154324	HR	6.43638	0.768751	1.42653	29.0405
Baseline	RF = 0	A.0 Overall, possible interaction	ANOVA	0.419271	NA	NA	NA	NA	NA
Baseline	RF = 0	A.1 All patients, no interaction	contrast (X)	0.537208	HR	1.42208	0.570657	0.464706	4.35179
Baseline	RF = 0	A.1 Tofacitinib 5 mg BID	contrast (X)	0.750113	HR	1.3375	0.913053	0.223409	8.00727
Baseline	RF = 0	A.1 Tofacitinib 10 mg BID	contrast (X)	0.856943	HR	0.863015	0.817247	0.173931	4.28214
Baseline	RF = 0	A.1 TNFi	contrast (X)	NA	HR	NA	NA	NA	NA
Baseline	RF = 0	B.0 Interaction [Tofacitinib 10 mg BID]	interaction	NA	NA	NA	NA	NA	NA
Baseline	RF = 0	B.all.1 Tofacitinib 5 mg BID vs TNFi	contrast (H)	0.361204	HR	2.14674	0.836682	0.416481	11.0653
Baseline	RF = 0	B.all.1 Tofacitinib 10 mg BID vs TNFi	contrast (H)	0.191185	HR	2.90736	0.816511	0.586792	14.405
Baseline	RF = 0	B.lowDdim.2 Tofacitinib 5 mg BID vs TNFi	contrast (H)	NA	HR	NA	NA	NA	NA
Baseline	RF = 0	B.lowDdim.2 Tofacitinib 10 mg BID vs TNFi	contrast (H)	NA	HR	NA	NA	NA	NA
Baseline	RF = 0	B.highDdim.3 Tofacitinib 5 mg BID vs TNFi	contrast (H)	0.811249	HR	1.24362	0.912947	0.207771	7.4437
Baseline	RF = 0	B.highDdim.3 Tofacitinib 10 mg BID vs TNFi	contrast (H)	0.722877	HR	1.38232	0.912987	0.230925	8.27453
Month12	RF = 0	A.0 Overall, possible interaction	ANOVA	0.157484	NA	NA	NA	NA	NA
Month12	RF = 0	A.1 All patients, no interaction	contrast (X)	0.143153	HR	3.31847	0.81925	0.666179	16.5304
Month12	RF = 0	A.1 Tofacitinib 5 mg BID	contrast (X)	NA	HR	NA	NA	NA	NA
Month12	RF = 0	A.1 Tofacitinib 10 mg BID	contrast (X)	0.852755	HR	1.23904	1.1548	0.12886	11.9139
Month12	RF = 0	A.1 TNFi	contrast (X)	NA	HR	NA	NA	NA	NA
Month12	RF = 0	B.0 Interaction [Tofacitinib 10 mg BID]	interaction	NA	NA	NA	NA	NA	NA
Month12	RF = 0	B.all.1 Tofacitinib 5 mg BID vs TNFi	contrast (H)	NA	HR	NA	NA	NA	NA
Month12	RF = 0	B.all.1 Tofacitinib 10 mg BID vs TNFi	contrast (H)	0.455715	HR	1.90794	0.866079	0.349428	10.4177
Month12	RF = 0	B.lowDdim.2 Tofacitinib 5 mg BID vs TNFi	contrast (H)	NA	HR	NA	NA	NA	NA
Month12	RF = 0	B.lowDdim.2 Tofacitinib 10 mg BID vs TNFi	contrast (H)	NA	HR	NA	NA	NA	NA
Month12	RF = 0	B.highDdim.3 Tofacitinib 5 mg BID vs TNFi	contrast (H)	NA	HR	NA	NA	NA	NA
Month12	RF = 0	B.highDdim.3 Tofacitinib 10 mg BID vs TNFi	contrast (H)	0.694012	HR	0.617637	1.2248	0.0559995	6.81211
Baseline	RF = 1	A.0 Overall, possible interaction	ANOVA	0.126747	NA	NA	NA	NA	NA
Baseline	RF = 1	A.1 All patients, no interaction	contrast (X)	0.0248947	HR	2.13357	0.337844	1.10036	4.13694
Baseline	RF = 1	A.1 Tofacitinib 5 mg BID	contrast (X)	0.432844	HR	1.77326	0.730326	0.423758	7.4204
Baseline	RF = 1	A.1 Tofacitinib 10 mg BID	contrast (X)	0.0401011	HR	2.49526	0.445457	1.04218	5.97433
Baseline	RF = 1	A.1 TNFi	contrast (X)	0.536915	HR	1.6026	0.763789	0.358663	7.16085
Baseline	RF = 1	B.0 Interaction [Tofacitinib 10 mg BID]	interaction	0.616555	NA	NA	NA	NA	NA
Baseline	RF = 1	B.all.1 Tofacitinib 5 mg BID vs TNFi	contrast (H)	0.704652	HR	1.21674	0.517556	0.44122	3.35539
Baseline	RF = 1	B.all.1 Tofacitinib 10 mg BID vs TNFi	contrast (H)	0.00111683	HR	4.03083	0.427689	1.74319	9.3206
Baseline	RF = 1	B.lowDdim.2 Tofacitinib 5 mg BID vs TNFi	contrast (H)	0.883264	HR	1.12737	0.816513	0.227536	5.5858
Baseline	RF = 1	B.lowDdim.2 Tofacitinib 10 mg BID vs TNFi	contrast (H)	0.120667	HR	2.91857	0.690148	0.754598	11.2882
Baseline	RF = 1	B.highDdim.3 Tofacitinib 5 mg BID vs TNFi	contrast (H)	0.741742	HR	1.24743	0.670867	0.334944	4.64577
Baseline	RF = 1	B.highDdim.3 Tofacitinib 10 mg BID vs TNFi	contrast (H)	0.00617344	HR	4.54423	0.552821	1.53779	13.4284
Month12	RF = 1	A.0 Overall, possible interaction	ANOVA	4.89e-05	NA	NA	NA	NA	NA
Month12	RF = 1	A.1 All patients, no interaction	contrast (X)	0.000871317	HR	4.29823	0.438019	1.82157	10.1422
Month12	RF = 1	A.1 Tofacitinib 5 mg BID	contrast (X)	NA	HR	NA	NA	NA	NA
Month12	RF = 1	A.1 Tofacitinib 10 mg BID	contrast (X)	0.00637689	HR	4.45712	0.54789	1.52297	13.0443
Month12	RF = 1	A.1 TNFi	contrast (X)	NA	HR	NA	NA	NA	NA
Month12	RF = 1	B.0 Interaction [Tofacitinib 10 mg BID]	interaction	NA	NA	NA	NA	NA	NA
Month12	RF = 1	B.all.1 Tofacitinib 5 mg BID vs TNFi	contrast (H)	0.431003	HR	1.7773	0.730302	0.424744	7.43695
Month12	RF = 1	B.all.1 Tofacitinib 10 mg BID vs TNFi	contrast (H)	0.00529788	HR	5.83335	0.632488	1.68866	20.1508
Month12	RF = 1	B.lowDdim.2 Tofacitinib 5 mg BID vs TNFi	contrast (H)	NA	HR	NA	NA	NA	NA
Month12	RF = 1	B.lowDdim.2 Tofacitinib 10 mg BID vs TNFi	contrast (H)	0.351817	HR	1.97383	0.730315	0.471698	8.25952
Month12	RF = 1	B.highDdim.3 Tofacitinib 5 mg BID vs TNFi	contrast (H)	NA	HR	NA	NA	NA	NA
Month12	RF = 1	B.highDdim.3 Tofacitinib 10 mg BID vs TNFi	contrast (H)	NA	HR	NA	NA	NA	NA
a. "X" refers to the binary biomarker indicator variable (D-dimer ≥2xULN vs. D-dimer <2x ULN). "H" refers to hazard rate.
Abbreviations: BID = twice daily; highDdim = d-dimer ≥2xULN; HR = hazard ratio; ln = natural logarithm; lowDdim = d-dimer <2xULN; NA = not applicable; RF = VTE risk factor count (of Age>=65 or BMI>=30); SE = standard error of the ln(HR); ULN = upper limit of normal; vs = versus; VTE = venous thromboembolism.

## Sheet: D-Dimer Levels and Changes
D-dimer Levels and Changes by Treatment Group, Time, and VTE Case Status
Metric of sub-hypothesis names	p-value typea	p-value	Effect size type	N	Effect size	SE (Log)	Lower 95% CI	Upper 95% CI
C.0 overall	ANOVA	0.511546	NA	NA	NA	NA	NA	NA
C.1 all Tofacitinib 5 mg BID vs. TNFi	contrast (X)	0.177131	DeltaLog	NA	0.0421801	0.0312469	-0.0190825	0.103443
C.1.all Tofacitinib 10 mg BID vs TNFi	contrast (X)	0.102786	DeltaLog	NA	0.0513225	0.0314497	-0.0103377	0.112983
C.2 ctrl Tofacitinib 5 mg BID vs. TNFi	contrast (X)	0.164971	DeltaLog	NA	0.0436091	0.0314001	-0.017954	0.105172
C.2.ctrl Tofacitinib 10 mg BID vs TNFi	contrast (X)	0.115891	DeltaLog	NA	0.0498843	0.0317204	-0.0123067	0.112075
C.3 case Tofacitinib 5 mg BID vs. TNFi	contrast (X)	0.679074	DeltaLog	NA	-0.138326	0.334315	-0.793784	0.517132
C.3.case Tofacitinib 10 mg BID vs TNFi	contrast (X)	0.995133	DeltaLog	NA	-0.00180742	0.296282	-0.582698	0.579083
C.4 ctrl Tofacitinib 5 mg BID	NA	NA	ugFEU/mL (exp(LSM(Log)))	1243	1.13188	0.0221943	1.08368	1.18222
C.4.ctrl Tofacitinib 10 mg BID	NA	NA	ugFEU/mL (exp(LSM(Log)))	1194	1.139	0.0226451	1.08954	1.19071
C.4.ctrl TNFi	NA	NA	ugFEU/mL (exp(LSM(Log)))	1241	1.08358	0.0222122	1.0374	1.13181
C.5 case Tofacitinib 5 mg BID	NA	NA	ugFEU/mL (exp(LSM(Log)))	14	1.09815	0.209128	0.728773	1.65474
C.5.case Tofacitinib 10 mg BID	NA	NA	ugFEU/mL (exp(LSM(Log)))	31	1.25878	0.140539	0.955617	1.65812
C.5.case TNFi	NA	NA	ugFEU/mL (exp(LSM(Log)))	9	1.26106	0.260829	0.756213	2.10293
D.m12.0 overall	ANOVA	0.0209373	NA	NA	NA	NA	NA	NA
D.m12.1.all Tofacitinib 5 mg BID vs TNFi	contrast (CFB)	0.0141761	DeltaCFB Log	NA	-0.0701641	0.0285899	-0.126221	-0.0141071
D.m12.1.all Tofacitinib 10 mg BID vs TNFi	contrast (CFB)	0.174101	DeltaCFB Log	NA	-0.0394486	0.029018	-0.096345	0.0174477
D.m12.2.ctrl Tofacitinib 5 mg BID vs TNFi	contrast (CFB)	0.00887166	DeltaCFB Log	NA	-0.0748359	0.0285784	-0.13087	-0.0188014
D.m12.2.ctrl Tofacitinib 10 mg BID vs TNFi	contrast (CFB)	0.119365	DeltaCFB Log	NA	-0.0453322	0.0290987	-0.102387	0.0117225
D.m12.3.case Tofacitinib 5 mg BID vs TNFi	contrast (CFB)	0.0661249	DeltaCFB Log	NA	0.728369	0.396235	-0.0485405	1.50528
D.m12.3.case Tofacitinib 10 mg BID vs TNFi	contrast (CFB)	0.718635	DeltaCFB Log	NA	0.119193	0.3308	-0.529416	0.767801
D.m12.4 ctrl Tofacitinib 5 mg BID	NA	NA	ugFEU/mL (exp(LSM(Log)))	1080	0.715542	0.0215546	0.685932	0.74643
D.m12.4.ctrl Tofacitinib 10 mg BID	NA	NA	ugFEU/mL (exp(LSM(Log)))	1007	0.73514	0.0222741	0.703725	0.767956
D.m12.4.ctrl TNFi	NA	NA	ugFEU/mL (exp(LSM(Log)))	1056	0.757006	0.0217759	0.725366	0.790027
D.m12.5 case Tofacitinib 5 mg BID	NA	NA	ugFEU/mL (exp(LSM(Log)))	6	1.99361	0.278322	1.15517	3.44057
D.m12.5.case Tofacitinib 10 mg BID	NA	NA	ugFEU/mL (exp(LSM(Log)))	19	1.15825	0.158913	0.848181	1.58167
D.m12.5.case TNFi	NA	NA	ugFEU/mL (exp(LSM(Log)))	5	1.01385	0.308491	0.553724	1.85632
d.m12.4 ctrl Tofacitinib 5 mg BID	p-value vs. 0	9.1e-81	LSM CFB(Log)	1057	-0.395447	0.0201725	-0.434999	-0.355894
d.m12.4.ctrl Tofacitinib 10 mg BID	p-value vs. 0	1.73e-65	LSM CFB(Log)	985	-0.365943	0.0209083	-0.406938	-0.324947
d.m12.4.ctrl TNFi	p-value vs. 0	3.23e-54	LSM CFB(Log)	1042	-0.320611	0.020278	-0.36037	-0.280851
d.m12.5 case Tofacitinib 5 mg BID	p-value vs. 0	0.0173363	LSM CFB(Log)	6	0.63608	0.267174	0.112225	1.15993
d.m12.5.case Tofacitinib 10 mg BID	p-value vs. 0	0.861562	LSM CFB(Log)	18	0.0269033	0.154262	-0.275562	0.329369
d.m12.5.case TNFi	p-value vs. 0	0.752531	LSM CFB(Log)	5	-0.0922894	0.292674	-0.666144	0.481565
D.eos.0 overall	ANOVA	0.0895531	NA	NA	NA	NA	NA	NA
D.eos.2.ctrl Tofacitinib 5 mg BID vs TNFi	contrast (CFB)	0.891676	DeltaCFB Log	NA	0.00588739	0.0432232	-0.0789048	0.0906796
D.eos.2.ctrl Tofacitinib 10 mg BID vs TNFi	contrast (CFB)	0.832237	DeltaCFB Log	NA	-0.00942104	0.0444653	-0.09665	0.0778079
D.eos.4 ctrl Tofacitinib 5 mg BID	NA	NA	ugFEU/mL from LSM(Log)	436	0.763257	0.0314847	0.717544	0.811883
D.eos.4.ctrl Tofacitinib 10 mg BID	NA	NA	ugFEU/mL from LSM(Log)	388	0.756374	0.0332601	0.708601	0.807368
D.eos.4.ctrl TNFi	NA	NA	ugFEU/mL from LSM(Log)	451	0.747628	0.0310614	0.703434	0.794598
d.eos.4 ctrl Tofacitinib 5 mg BID	p-value vs. 0	9.26e-26	LSM CFB(Log)	427	-0.330403	0.0308381	-0.390899	-0.269907
d.eos.4.ctrl Tofacitinib 10 mg BID	p-value vs. 0	2.39e-25	LSM CFB(Log)	382	-0.345711	0.0325563	-0.409578	-0.281845
d.eos.4.ctrl TNFi	p-value vs. 0	1.85e-27	LSM CFB(Log)	444	-0.33629	0.0302927	-0.395716	-0.276864
Abbreviations: BID = twice daily; CFB = change from baseline at Month 12; eos = End of Study; exp= inverse natural logarithm; FEU = fibrinogen equivalent units; Hyp = hypothesis; ln = natural logarithm; Log = ln[D-dimer]; LSM = Least-Squares Mean; m12= Month 12; MMRM = Mixed-Model Repeated Measures; NA = not applicable; SE = standard error of ln(HR); vs = versus; VTE = venous thromboembolism.
